# Supplementary material for: Ecologically Intermediate and Economically Final: The Role of the Ecosystem Services Framework in Measuring Sustainability in Agri-Food Systems
Source: MDPI journal article supplement (doi:10.3390/land11010084), 2022-01-06
Supplement: s1 [file s1]

Archive with 1 entries (1 files):
- land-1481829-supplementary.pdf
